# Supplementary material for: Contrasting thinning patterns between lake- and land-terminatingglaciers in the Bhutan Himalaya
Source: Copernicus journal article supplement (doi:10.5194/tc-2018-15), 2018-02-13
Supplement: Supplementary file 1 [file tc-2018-15-supplement.zip]

Archive with 2 entries (2 files):
- tsutaki_TCD_20180212_supplement/tsutaki_TCD_20180212_supplement.pdf
- tsutaki_TCD_20180212_supplement/tsutaki_TCD_20180212_supplement.xlsx
