# Supplementary material for: Contrasting thinning patterns between lake- and land-terminatingglaciers in the Bhutan Himalaya
Source: Copernicus journal article supplement (doi:10.5194/tc-2018-15), 2018-02-13
Supplement: Supplementary file 1 [file tc-2018-15-supplement.zip › tsutaki_TCD_20180212_supplement/tsutaki_TCD_20180212_supplement.pdf]

**Table S1.** Characteristics of the studied glaciers in the Lunana region, Bhutan Himalaya, and summary of the differential GPS surveys in 2004 and 2011. The glacier areas are based on ALOS PRISM images acquired in 2010 (Nagai et al., 2016). The mean slopes are based on ASTER GDEM2. The numbers of survey points are obtained from the 1 m grid DEMs.

| Glacier     | Area<br>(km <sup>2</sup> ) | Mean slope<br>(degree) | Date of survey  |                 | Number of survey points |       |
|-------------|----------------------------|------------------------|-----------------|-----------------|-------------------------|-------|
|             |                            |                        | 2004<br>(MM/DD) | 2011<br>(MM/DD) | 2004                    | 2011  |
| Thorthormi  | 13.16                      | 0.1                    | 10/02, 03, 05   | 09/18           | 25388                   | 25752 |
| Lugge       | 10.93                      | 11.8                   | 10/06           | 09/20           | 8114                    | 17900 |
| Lugge II    | 3.18                       | 14.7                   | 10/09           | 09/21           | 5052                    | 13991 |
| Off glacier |                            |                        | 09/29–10/10     | 09/18–22        | 38171                   | 64608 |

**Table S2.** Dates of the ASTER images used for the surface flow velocity analysis and length of the measurement period.

| Pre image<br>(YYYY/MM/DD) | Post image<br>(YYYY/MM/DD) | Length of measurement period<br>(Day (year)) |
|---------------------------|----------------------------|----------------------------------------------|
| 2002/10/22                | 2003/07/21                 | 273 (0.75)                                   |
| 2006/02/03                | 2007/01/30                 | 362 (0.99)                                   |
| 2007/01/30                | 2008/01/01                 | 337 (0.92)                                   |
| 2008/01/01                | 2009/12/12                 | 712 (1.95)                                   |
| 2009/12/12                | 2010/10/12                 | 305 (0.83)                                   |

**Table S3.** Details of the ASTER images used for the thermal resistance calculation in this study.

| Acquisition date<br>(YYYY/MM/DD) | ASTER granule ID             |
|----------------------------------|------------------------------|
| 2002/10/22                       | AST3A10210220448051102020056 |
| 2003/07/21                       | AST3A10307210446080407230013 |
| 2005/09/28                       | AST3A10509280446011110140033 |
| 2006/02/03                       | AST3A10602030445411110140028 |
| 2006/12/04                       | AST3A10612040446231110140026 |
| 2007/05/06                       | AST3A10705060441001110140025 |
| 2007/10/29                       | AST3A10710290440431110140023 |
| 2010/10/12                       | AST3A11010120446391110140074 |

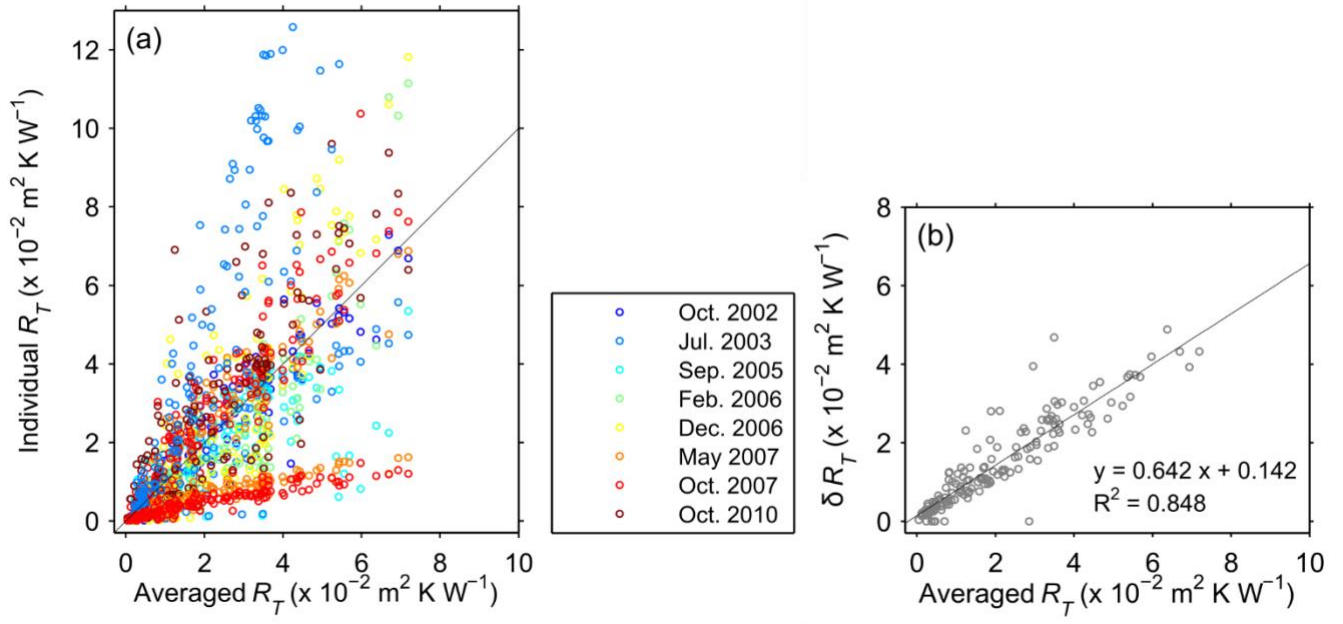

**Figure S1.** (a) Scattergram of thermal resistance ( $R_T$ ) of the multitemporal ASTER data against their average, which is used to calculate the degree of ice melt under the debris-covered surface of Thorthormi, Lugge, and Lugge II glaciers. (b) Standard deviations ( $\delta$ ) of thermal resistance.

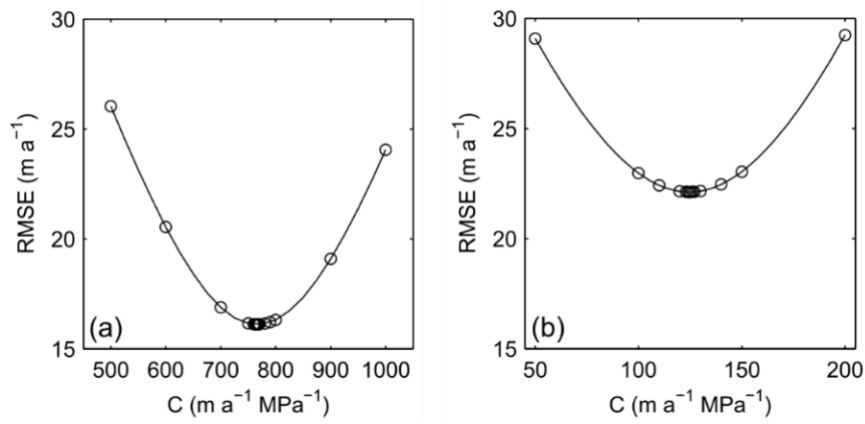

**Figure S2.** RMSEs between the modelled and measured surface flow velocities of (a) Thorthormi and (b) Lugge glaciers, modelled with a changing sliding coefficient ( $C$ ).

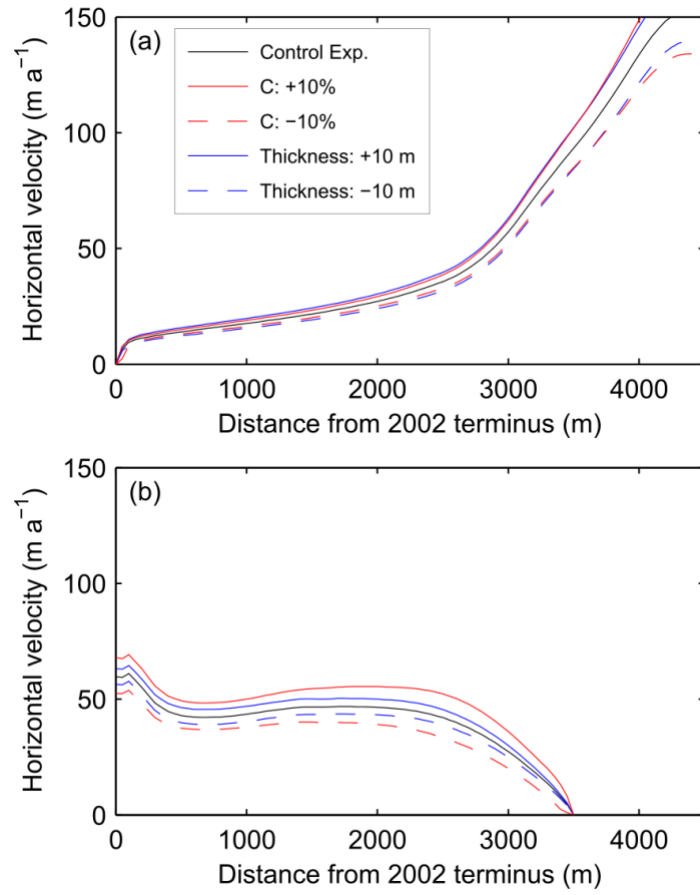

**Figure S3.** Sensitivity of the horizontal flow velocity of (a) Thorthormi and (b) Luggé glaciers due to a change in the sliding coefficient ( $C$ ) of  $\pm 10\%$  (red lines) and a change in ice thickness of  $\pm 10$  m (blue lines). The black line is the control experiment.
