# Supplementary material for: Contrasting thinning patterns between lake- and land-terminatingglaciers in the Bhutan Himalaya
Source: Copernicus journal article supplement (doi:10.5194/tc-2018-15), 2018-02-13
Supplement: Supplementary file 1 [file tsutaki_TCD_20180212_supplement.xlsx]

## Sheet: Fig1a_Fig2
Note: Only a part of the data is listed in this sheet. All data will be released in the supplement to the accepted paper for The Cryosphere.
Elevation difference on off-glacier between 2004 and 2011						The rate of elevation change on Thorthormi Glacier							The rate of elevation change on Lugge Glacier							The rate of elevation change on Lugge II Glacier
UTM 46N Easting	UTM 46N Northing	Elevation in 2004	Elevation in 2011	Elevation difference		UTM 46N Easting	UTM 46N Northing	Elevation in 2004	Elevation in 2011	Distance from the glacier terminus	The rate of elevation change		UTM 46N Easting	UTM 46N Northing	Elevation in 2004	Elevation in 2011	Distance from the glacier terminus	The rate of elevation change		UTM 46N Easting	UTM 46N Northing	Elevation in 2004	Elevation in 2011	Distance from the glacier terminus	The rate of elevation change
m	m	m	m	m		m	m	m	m	m	m a-1		m	m	m	m	m	m a-1		m	m	m	m	m	m a-1
234102	3.11248e+06	5027.58	5027.33	-0.25		232520	3.11282e+06	4446.83	4435.09	2910.18	-1.68		236804	3.11107e+06	4647.86	4593.23	1516.53	-7.81		235232	3.11201e+06	4874.94	4867.27	1625.28	-1.1
234102	3.11248e+06	5026.98	5027.37	0.39		232520	3.11282e+06	4446.83	4434.17	2909.66	-1.81		236810	3.11106e+06	4645.98	4608.3	1515.22	-5.38		235234	3.11201e+06	4875.04	4867.08	1625.89	-1.14
234104	3.11248e+06	5027.35	5027.36	0		232520	3.11282e+06	4446.87	4433	2909.13	-1.98		236810	3.11106e+06	4645.35	4608.29	1514.68	-5.29		235228	3.112e+06	4872.79	4867.63	1617.24	-0.74
234100	3.11248e+06	5027.14	5027.03	-0.11		232520	3.11282e+06	4446.88	4434.35	2908.61	-1.79		236812	3.11106e+06	4644.78	4608.21	1514.97	-5.22		235228	3.112e+06	4872.9	4867.81	1618.18	-0.73
234100	3.11248e+06	5027.31	5027.1	-0.21		232520	3.11282e+06	4446.98	4434.03	2908.09	-1.85		236804	3.11105e+06	4641.98	4585.45	1505.83	-8.08		235226	3.11199e+06	4871.72	4867.08	1614.97	-0.66
.	.	.	.	.		.	.	.	.	.	.		.	.	.	.	.	.		.	.	.	.	.	.
.	.	.	.	.		.	.	.	.	.	.		.	.	.	.	.	.		.	.	.	.	.	.
.	.	.	.	.		.	.	.	.	.	.		.	.	.	.	.	.		.	.	.	.	.	.
235374	3.11061e+06	4605.53	4607.26	1.73		231154	3.11111e+06	4422.44	4414.51	1132.62	-1.13		236224	3.11052e+06	4561.29	4525.23	741.29	-5.15		234012	3.11144e+06	4608.22	4607.23	310.779	-0.14
235376	3.11061e+06	4605.61	4607.38	1.77		231154	3.1111e+06	4423.23	4411.1	1134.69	-1.73		236224	3.11052e+06	4561.38	4524.82	742.211	-5.22		234012	3.11144e+06	4608.61	4607.17	311.777	-0.21
235376	3.11061e+06	4608.78	4607.45	-1.33		231152	3.1111e+06	4423.45	4415.4	1133.88	-1.15		236226	3.11052e+06	4561.62	4524.23	743.132	-5.34		234014	3.11144e+06	4608.39	4606.91	312.775	-0.21
235378	3.11061e+06	4608.69	4607.47	-1.22		231154	3.1111e+06	4423.47	4416.36	1134.87	-1.02		236316	3.11051e+06	4568.9	4533.21	823.685	-5.1		234014	3.11144e+06	4608.34	4606.71	313.772	-0.23
235378	3.11061e+06	4608.98	4607.65	-1.33		231154	3.11109e+06	4423.15	4413.05	1137.49	-1.44		236316	3.11051e+06	4568.89	4533.26	824.287	-5.09		234016	3.11144e+06	4607.88	4606.74	314.77	-0.16

## Sheet: Fig1b
Note: Only a part of the data is listed in this sheet. All data will be released in the supplement to the accepted paper for The Cryosphere.
Surface flow velocity on glaciers derived from satellite image analysis
22 October 2002 / 21 July 2003					3 January 2006 / 30 January 2007					30 January 2007 / 1 January 2008					1 January 2008 / 12 December 2009					12 December 2009 / 12 October 2010
UTM 46N Easting	UTM 46N Northing	Direction from East (positive is E > N > W, negative is E > S > W)	Magnitude		UTM 46N Easting	UTM 46N Northing	Direction from East (positive is E > N > W, negative is E > S > W)	Magnitude		UTM 46N Easting	UTM 46N Northing	Direction from East (positive is E > N > W, negative is E > S > W)	Magnitude		UTM 46N Easting	UTM 46N Northing	Direction from East (positive is E > N > W, negative is E > S > W)	Magnitude		UTM 46N Easting	UTM 46N Northing	Direction from East (positive is E > N > W, negative is E > S > W)	Magnitude
m	m	degree	m a-1		m	m	degree	m a-1		m	m	degree	m a-1		m	m	degree	m a-1		m	m	degree	m a-1
231870	3115585	82.65	7.59		231870	3115585	-134.92	2.72		231885	3115540	-81.98	14.23		231945	3115435	-178.33	5.64		235095	3115585	-23.13	9.49
232665	3115585	135.29	3.52		231885	3115585	-170.03	3.98		231900	3115540	-80.13	19.94		231960	3115435	-153.35	5.66		235110	3115585	-28.09	6.26
232710	3115585	178.87	3.33		231900	3115585	101.92	1.66		231915	3115540	-73.8	14.73		231975	3115435	-138.84	6.91		235140	3115585	129.8	7.28
232725	3115585	177.1	3.6		231915	3115585	32.86	12.35		231930	3115540	-79.88	15.48		231990	3115435	-129.18	7.3		235155	3115585	157.63	10.24
232740	3115585	169.64	3.21		231930	3115585	33.45	13.82		231945	3115540	-89.34	16.18		232005	3115435	-129.76	7.7		235170	3115585	165.93	11.55
.	.	.	.		.	.	.	.		.	.	.	.		.	.	.	.		.	.	.	.
.	.	.	.		.	.	.	.		.	.	.	.		.	.	.	.		.	.	.	.
.	.	.	.		.	.	.	.		.	.	.	.		.	.	.	.		.	.	.	.
235845	3110095	-144.74	26.89		235815	3110095	15.5	53.86		235875	3110110	21.86	44.04		236175	3110200	35.14	31.27		236070	3110185	97.24	118.29
235860	3110095	-142.25	27.92		235830	3110095	13.21	46.55		235890	3110110	24.42	42.06		236190	3110200	41.21	15.2		236085	3110185	98.1	121.46
235875	3110095	-139.73	29.39		235845	3110095	16.3	41.9		235950	3110110	28.22	33.72		236130	3110185	34.12	31.57		236100	3110185	99.97	126.78
235890	3110095	-139.91	31.53		235815	3110080	15.16	53.4		235845	3110095	15.75	50.6		236145	3110185	33.78	31.56		236145	3110185	-107.59	85.63
235815	3110080	-156.82	28.46		235830	3110080	12.37	46.66		235860	3110095	18.91	44.51		236160	3110185	33.77	31.75		236160	3110185	-108.1	78.22

## Sheet: Fig1c
Note: Only a part of the data is listed in this sheet. All data will be released in the supplement to the accepted paper for The Cryosphere.
Surface mass balance (SMB) on Thorthormi Glacier						Surface mass balance (SMB) on Lugge Glacier						Surface mass balance (SMB) on Lugge II Glacier
UTM 46N Easting	UTM 46N Northing	Elevation	Mean SMB	Uncertainty		UTM 46N Easting	UTM 46N Northing	Elevation	Mean SMB	Uncertainty		UTM 46N Easting	UTM 46N Northing	Elevation	Mean SMB	Uncertainty
m	m	m	m w.e. a-1	m w.e. a-1		m	m	m	m w.e. a-1	m w.e. a-1		m	m	m	m w.e. a-1	m w.e. a-1
232185	3114645	4884.9	-4.256	0.018		236505	3112665	5257.8	-1.053	0.044		234795	3113655	5404.9	0.157	0.018
232455	3114645	4797.4	-4.196	0.078		236595	3112665	5251.9	-0.642	0.007		234795	3113565	5376.7	-0.519	0.068
232185	3114555	4848.4	-4.674	0.063		237315	3112665	5209	-1.258	0.113		234885	3113565	5374.7	-0.317	0.031
232275	3114555	4798.9	-4.595	0.085		236505	3112575	5223.6	-1.084	0.04		235065	3113565	5384.8	-0.304	0.007
232365	3114555	4775.6	-4.485	0.066		237315	3112575	5155.9	-1.877	0.023		234885	3113475	5314.5	-0.941	0.053
.	.	.	.	.		.	.	.	.	.		.	.	.	.	.
.	.	.	.	.		.	.	.	.	.		.	.	.	.	.
.	.	.	.	.		.	.	.	.	.		.	.	.	.	.
232275	3111945	4490.2	-8.305	0.081		236505	3110685	4668.2	-6.854	0.009		235605	3113205	5323.2	-1.93	0.006
232095	3111855	4485.1	-8.347	0.08		236415	3110595	4650	-6.976	0.003		235245	3113115	5213.6	-3.005	0.07
232185	3111855	4491.4	-8.298	0.079		236145	3110415	4595.9	-7.416	0.022		235245	3112935	5177.2	-3.294	0.037
232275	3111855	4501.9	-8.199	0.074		235965	3110325	4584.2	-7.513	0.033		235425	3112935	5208.7	-3.062	0.072
232185	3111765	4497.6	-8.238	0.07		236055	3110325	4578.4	-7.566	0.031		235155	3112845	5148.8	-3.529	0.078

## Sheet: Fig3
Note: Only a part of the data is listed in this sheet. All data will be released in the supplement to the accepted paper for The Cryosphere.
Surface flow velocity along the central flowline of Thorthormi Glacier											Surface flow velocity along the central flowline of Lugge Glacier											Surface flow velocity along the central flowline of Lugge II Glacier
UTM 46N Easting	UTM 46N Northing	Distance from the glacier terminus	Velocity 2002/03	Velocity 2006/07	Velocity 2007/08	Velocity 2008/09	Velocity 2009/10	Mean velocity	Standard deviation		UTM 46N Easting	UTM 46N Northing	Distance from the glacier terminus	Velocity 2002/03	Velocity 2006/07	Velocity 2007/08	Velocity 2008/09	Velocity 2009/10	Mean velocity	Standard deviation		UTM 46N Easting	UTM 46N Northing	Distance from the glacier terminus	Velocity 2002/03	Velocity 2006/07	Velocity 2007/08	Velocity 2008/09	Velocity 2009/10	Mean velocity	Standard deviation
m	m	m	m a-1	m a-1	m a-1	m a-1	m a-1	m a-1	m a-1		m	m	m	m a-1	m a-1	m a-1	m a-1	m a-1	m a-1	m a-1		m	m	m	m a-1	m a-1	m a-1	m a-1	m a-1	m a-1	m a-1
230035	3111302	0									235542	3110232	0									234194	3111532	0			5.51	3.89		4.7	1.14551
230050	3111299	15									235557	3110232	15									234206	3111541	15			11.25	3.3		7.275	5.6215
230065	3111297	30									235572	3110231	30									234218	3111550	30			9.69	3.08		6.385	4.67398
230080	3111295	45									235587	3110231	45									234230	3111559	45			3.58	3.47		3.525	0.0777817
230095	3111293	60		5.97				5.97	0		235602	3110231	60									234242	3111569	60		4.76	7.76	2.4		4.97333	2.68636
.	.	.	.	.	.	.	.	.	.		.	.	.	.	.	.	.	.	.	.		.	.	.	.	.	.	.	.	.	.
.	.	.	.	.	.	.	.	.	.		.	.	.	.	.	.	.	.	.	.		.	.	.	.	.	.	.	.	.	.
.	.	.	.	.	.	.	.	.	.		.	.	.	.	.	.	.	.	.	.		.	.	.	.	.	.	.	.	.	.
232925	3115161	5744	21.07			5.22	8.74	11.6767	8.32308		236550	3113555	4349				16.03		16.03	0		235557	3113536	3104	16.78	11.43		9.12		12.4433	3.92925
232926	3115176	5759	21.42			5.41	8.29	11.7067	8.53436		236545	3113569	4364				13.73		13.73	0		235571	3113542	3119	15.62	14.18		12.42		14.0733	1.60266
232928	3115191	5774				6.17	7.59	6.88	1.00409		236539	3113583	4379				12.69		12.69	0		235584	3113548	3134	14.41	13.73		16.76	32.64	19.385	8.9315
232930	3115206	5789				6.44	8.36	7.4	1.35765		236535	3113597	4394				12.69		12.69	0		235599	3113553	3149	14.79	11.95		14.03	33.31	18.52	9.93281
232932	3115221	5804				6.99	8.76	7.875	1.25158		236531	3113612	4409				11.39		11.39	0		235613	3113558	3164	14.74	10.76		15.18	31.21	17.9725	9.04615

## Sheet: Fig4
Note: Only a part of the data is listed in this sheet. All data will be released in the supplement to the accepted paper for The Cryosphere.
Glacier boundaries of Thorthormi Glacier																									Glacier boundaries of Lugge Glacier
2000-11-17		2001-11-04		2002-11-07		2003-11-26		2004-11-28		2005-11-15		2006-11-18		2007-11-21		2008-11-23		2009-11-26		2010-11-29		2011-12-02			2000-11-17		2001-11-04		2002-11-07		2003-11-26		2004-11-28		2005-11-15		2006-11-18		2007-11-21		2008-11-23		2009-11-26		2010-11-29		2011-12-02
UTM 46N Easting	UTM 46N Northing	UTM 46N Easting	UTM 46N Northing	UTM 46N Easting	UTM 46N Northing	UTM 46N Easting	UTM 46N Northing	UTM 46N Easting	UTM 46N Northing	UTM 46N Easting	UTM 46N Northing	UTM 46N Easting	UTM 46N Northing	UTM 46N Easting	UTM 46N Northing	UTM 46N Easting	UTM 46N Northing	UTM 46N Easting	UTM 46N Northing	UTM 46N Easting	UTM 46N Northing	UTM 46N Easting	UTM 46N Northing		UTM 46N Easting	UTM 46N Northing	UTM 46N Easting	UTM 46N Northing	UTM 46N Easting	UTM 46N Northing	UTM 46N Easting	UTM 46N Northing	UTM 46N Easting	UTM 46N Northing	UTM 46N Easting	UTM 46N Northing	UTM 46N Easting	UTM 46N Northing	UTM 46N Easting	UTM 46N Northing	UTM 46N Easting	UTM 46N Northing	UTM 46N Easting	UTM 46N Northing	UTM 46N Easting	UTM 46N Northing	UTM 46N Easting	UTM 46N Northing
m	m	m	m	m	m	m	m	m	m	m	m	m	m	m	m	m	m	m	m	m	m	m	m		m	m	m	m	m	m	m	m	m	m	m	m	m	m	m	m	m	m	m	m	m	m	m	m
233032	3.11388e+06	232966	3.11357e+06	230093	3.11148e+06	232946	3.11334e+06	232955	3.11337e+06	232967	3.11304e+06	231199	3.11104e+06	232179	3.11291e+06	230863	3.11109e+06	232172	3.11278e+06	230603	3.11131e+06	232194	3.11276e+06		236103	3.11009e+06	236109	3.11009e+06	235513	3.11008e+06	236108	3.1101e+06	236110	3.11009e+06	236107	3.11009e+06	235670	3.1104e+06	235730	3.11033e+06	235951	3.11005e+06	236378	3.11082e+06	235980	3.11018e+06	236086	3.11051e+06
233031	3.11388e+06	232979	3.11354e+06	230104	3.11149e+06	232939	3.11333e+06	232952	3.11336e+06	232966	3.11304e+06	231157	3.11103e+06	232199	3.11294e+06	230852	3.11109e+06	232174	3.1128e+06	230600	3.1113e+06	232219	3.11279e+06		236086	3.11007e+06	236085	3.11008e+06	235526	3.11012e+06	236101	3.11009e+06	236090	3.11009e+06	236102	3.11009e+06	235688	3.11042e+06	235732	3.11038e+06	235951	3.11005e+06	236393	3.11085e+06	235970	3.1102e+06	236085	3.11051e+06
233031	3.11387e+06	232992	3.11352e+06	230135	3.11152e+06	232938	3.11331e+06	232949	3.11335e+06	232953	3.11301e+06	231115	3.11101e+06	232220	3.11303e+06	230851	3.11109e+06	232189	3.11284e+06	230547	3.11132e+06	232235	3.11283e+06		236055	3.11005e+06	236052	3110058	235545	3.11016e+06	236101	3.11009e+06	236061	3.11007e+06	236080	3.11008e+06	235719	3.11044e+06	235755	3.11041e+06	235926	3.11007e+06	236447	3.11093e+06	235972	3.11025e+06	236054	3.11053e+06
233028	3.11386e+06	232986	3.1135e+06	230148	3.11156e+06	232946	3.1133e+06	232942	3.11333e+06	232951	3.11298e+06	231080	3.11101e+06	232229	3.1131e+06	230847	3.11109e+06	232195	3.11287e+06	230498	3.11133e+06	232248	3.11286e+06		236022	3.11004e+06	236032	3.11005e+06	235551	3.1102e+06	236095	3.11009e+06	236040	3.11005e+06	236060	3.11007e+06	235738	3.11044e+06	235766	3.11044e+06	235921	3.11008e+06	236483	3.111e+06	235999	3.11027e+06	236059	3.11053e+06
233029	3.11385e+06	232977	3.11349e+06	230150	3.11157e+06	232942	3.11328e+06	232940	3.11331e+06	232954	3.11294e+06	231010	3.111e+06	232232	3.11313e+06	230806	3.11111e+06	232203	3.1129e+06	230440	3.11134e+06	232249	3.11289e+06		235993	3.11003e+06	236005	3.11004e+06	235549	3.11023e+06	236087	3.11008e+06	236028	3.11005e+06	236046	3.11005e+06	235760	3.11047e+06	235782	3.11046e+06	235901	3.1101e+06	236485	3.111e+06	236006	3.11027e+06	236070	3.11054e+06
.	.	.	.	.	.	.	.	.	.	.	.	.	.	.	.	.	.	.	.	.	.	.	.		.	.	.	.	.	.	.	.	.	.	.	.	.	.	.	.	.	.	.	.	.	.	.	.
.	.	.	.	.	.	.	.	.	.	.	.	.	.	.	.	.	.	.	.	.	.	.	.		.	.	.	.	.	.	.	.	.	.	.	.	.	.	.	.	.	.	.	.	.	.	.	.
.	.	.	.	.	.	.	.	.	.	.	.	.	.	.	.	.	.	.	.	.	.	.	.		.	.	.	.	.	.	.	.	.	.	.	.	.	.	.	.	.	.	.	.	.	.	.	.
233084	3.11397e+06	232985	3.1137e+06	230086	3.11142e+06	232964	3.11344e+06	232942	3.11339e+06	232960	3.1131e+06	231269	3.11111e+06	232122	3.11278e+06	230916	3.11108e+06	232176	3.11275e+06	230693	3.11137e+06	232158	3.11265e+06		236164	3.11015e+06	236163	3.11014e+06	235526	3.10996e+06	236170	3.11015e+06	236191	3.11016e+06	236189	3.11016e+06	235700	3.11029e+06	235788	3.11021e+06	236037	3.11005e+06	236332	3.11077e+06	235997	3.11012e+06	236191	3.11042e+06
233062	3.11394e+06	232975	3.11366e+06	230086	3.11142e+06	232960	3.11343e+06	232941	3.11339e+06	232955	3.11308e+06	231265	3.1111e+06	232125	3.11278e+06	230910	3.11108e+06	232177	3.11276e+06	230668	3.1114e+06	232160	3.11265e+06		236139	3.11014e+06	236146	3.11014e+06	235524	3.10997e+06	236146	3.11014e+06	236146	3.11014e+06	236145	3.11014e+06	235700	3.1103e+06	235763	3.11027e+06	236002	3.11004e+06	236362	3.1108e+06	235989	3.11013e+06	236179	3.11045e+06
233045	3.11391e+06	232966	3.11363e+06	230077	3.11143e+06	232960	3.11343e+06	232940	3.11338e+06	232951	3.11307e+06	231241	3.11108e+06	232161	3.11284e+06	230890	3.11109e+06	232177	3.11277e+06	230638	3.11138e+06	232170	3.11269e+06		236120	3.11012e+06	236119	3110123	235516	3.11e+06	236119	3.11012e+06	236120	3.11012e+06	236119	3.11012e+06	235698	3.11031e+06	235742	3.11029e+06	235993	3.11003e+06	236369	3.1108e+06	235988	3110127	236147	3.11048e+06
233035	3.11389e+06	232965	3.1136e+06	230081	3.11145e+06	232944	3.11334e+06	232940	3.11338e+06	232965	3.11304e+06	231212	3.11105e+06	232179	3.11291e+06	230865	3111086	232177	3.11278e+06	230606	3.11134e+06	232180	3.11273e+06		236110	3.1101e+06	236111	3.1101e+06	235511	3.11004e+06	236110	3.1101e+06	236111	3.1101e+06	236109	3.1101e+06	235683	3.11036e+06	235730	3.11033e+06	235970	3.11004e+06	236374	3.11082e+06	235984	3.11015e+06	236105	3.1105e+06
233032	3.11388e+06	232966	3.11357e+06	230093	3.11148e+06	232946	3.11334e+06	232955	3.11337e+06	232967	3.11304e+06	231199	3.11104e+06	232179	3.11291e+06	230863	3.11109e+06	232172	3.11278e+06	230603	3.11131e+06	232194	3.11276e+06		236103	3.11009e+06	236109	3.11009e+06	235513	3.11008e+06	236108	3.1101e+06	236110	3.11009e+06	236107	3.11009e+06	235670	3.1104e+06	235730	3.11033e+06	235951	3.11005e+06	236378	3.11082e+06	235980	3.11018e+06	236086	3.11051e+06

## Sheet: Fig5
Note: Only a part of the data is listed in this sheet. All data will be released in the supplement to the accepted paper for The Cryosphere.
Cumulative area change of glaciers
Date	Thorthormi	Lugge
	km2	km2
2000-11-17	0	0
2001-11-04	-0.023965	-0.11202
.	.	.
.	.	.
.	.	.
.	.	.
.	.	.
.	.	.
.	.	.
.	.	.
2010-11-29	-0.284708	-0.913489
2011-12-02	-0.32975	-1.40321

## Sheet: Fig6e_f
Note: Only a part of the data is listed in this sheet. All data will be released in the supplement to the accepted paper for The Cryosphere.
Observed and simulated horizontal flow velocities
Thorthormi Glacier (Fig6e)						Lugge Glacier (Fig6f)
Distance from the terminus	Observed surface velocity	Distance from the terminus	Simulated surface velocity	Simulated basal belocity		Distance from the terminus	Observed surface velocity	Distance from the terminus	Simulated surface velocity	Simulated basal belocity
m	m a-1	m	m a-1	m a-1		m	m a-1	m	m a-1	m a-1
25		0	0	0		25		0	59.644	62.556
75		50	6.63894	6.63102		75		50	59.4056	43.6996
125	6.02	100	9.53169	9.54196		125		100	61.0025	38.1165
175	5.37	150	10.5864	10.5685		175		150	58.0388	35.0509
225		200	11.3725	11.341		225		200	55.0046	32.9344
.	.	.	.	.		.	.	.	.	.
.	.	.	.	.		.	.	.	.	.
.	.	.	.	.		.	.	.	.	.
3975	115.2	3950	129.331	121.178		2225	22.43	2200	45.6197	35.9836
4025	116.12	4000	133.7	125.567		2275	13.53	2250	45.1991	35.856
4075	114.54	4050	137.848	130.121		2325	16.45	2300	44.8074	35.8447
4125	115.95	4100	141.768	134.438		2375	12.65	2350	44.2076	35.588
4175	114.76	4150	145.116	138.655		2425	8.98	2400	43.6364	35.436
		4200	148.115	142.434
		4250	150.283	145.812
		4300	152.044	148.579
		4350	152.879	150.748
		4400	153.342	152.223
		4450	153.11	153.001
		4500	152.649	153.246
		4550	151.828	152.93

## Sheet: Fig7e_f
Note: Only a part of the data is listed in this sheet. All data will be released in the supplement to the accepted paper for The Cryosphere.
Observed and simulated horizontal flow velocities
Thorthormi Glacier (Fig7e)						Lugge Glacier (Fig7f)
Distance from the terminus	Observed surface velocity	Distance from the terminus	Simulated surface velocity	Simulated basal belocity		Distance from the terminus	Observed surface velocity	Distance from the terminus	Simulated surface velocity	Simulated basal belocity
m	m a-1	m	m a-1	m a-1		m	m a-1	m	m a-1	m a-1
25		1400	62.1685	65.6847		25		-2100	0	0
75		1450	61.1487	59.9513		75		-2050	1.57476	1.59521
125	6.02	1500	60.2519	57.0361		125		-2000	2.06524	2.17431
175	5.37	1550	58.5198	56.031		175		-1950	2.23994	2.33475
225		1600	57.0281	55.1744		225		-1900	2.36681	2.43979
.	.	.	.	.		.	.	.	.	.
.	.	.	.	.		.	.	.	.	.
.	.	.	.	.		.	.	.	.	.
2975	73.08	4350	153.294	151.22		2225	22.43	100	13.2852	11.1523
3025	74.62	4400	153.722	152.644		2275	13.53	150	14.3553	11.93
3075	76.63	4450	153.469	153.386		2325	16.45	200	15.4277	12.6778
3125	74.18	4500	152.992	153.605		2375	12.65	250	16.6129	13.4977
3175	74.42	4550	152.168	153.267		2425	8.98	300	17.8024	14.3305
3225	77.45							350	19.0046	15.2009
3275	78.63							400	20.1921	16.0266
3325	80.16							450	21.3574	16.8732
3375	80.32							500	22.5182	17.6908
3425	80.67							550	23.7095	18.5329
3475	80.98							600	24.8951	19.3391
3525	86.81							650	26.1151	20.1767
3575	89.62							700	27.3259	20.9771
3625	95.46							750	28.5697	21.8082
3675	98.78							800	29.7985	22.5991
3725	100.83							850	31.0529	23.4201
3775	104.69							900	32.2828	24.1992
3825	107.41							950	33.5227	25.0033
3875	108.35							1000	34.7282	25.7625
3925	109.99							1050	35.9254	26.5391
3975	115.2							1100	37.0762	27.27
4025	116.12							1150	38.1935	28.0081
4075	114.54							1200	39.252	28.6979
4125	115.95							1250	40.2539	29.3813
4175	114.76							1300	41.1866	30.0214
								1350	42.0299	30.6387
								1400	42.7945	31.2009
								1450	43.4714	31.7296
								1500	44.0686	32.2713
								1550	44.4225	32.7793
								1600	44.6526	33.1741
								1650	44.8253	33.3639
								1700	44.9757	33.4171
								1750	45.2291	33.6508
								1800	45.492	33.9666
								1850	45.5833	34.238
								1900	45.6289	34.4676
								1950	45.6053	34.5048
								2000	45.59	34.7148
								2050	45.5363	34.8287
								2100	45.5011	35.0978
								2150	45.3866	35.233
								2200	45.2934	35.4773
								2250	45.1084	35.5182
								2300	44.9458	35.6521
								2350	44.6097	35.5605
								2400	44.2972	35.5832

## Sheet: Fig8a_b
Note: Only a part of the data is listed in this sheet. All data will be released in the supplement to the accepted paper for The Cryosphere.
Distance from the terminus	Thorthormi Glacier						Lugge Glacier
	Mean SMB	Standard deviation of SMB	Emergence velocity	Standard deviation of emergence velocity	Simulated surface elevation change rate	Uncertainty of simulated elevation change rate	Mean SMB	Standard deviation of SMB	Emergence velocity	Standard deviation of emergence velocity	Simulated surface elevation change rate	Uncertainty of simulated elevation change rate
m	m w.e. a-1	m w.e. a-1	m w.e. a-1	m w.e. a-1	m a-1	m a-1	m w.e. a-1	m w.e. a-1	m w.e. a-1	m w.e. a-1	m a-1	m a-1
0	-5.51945	0.60714
50	-5.72173	0.62939	1.15052	2.23607	-4.57121	2.86546			-11.6078	2.23607
100	-5.72173	0.62939	1.07318	2.23607	-4.64855	2.86546			-13.584	2.23607
150	-5.9053	0.649583	1.12404	2.23607	-4.78126	2.88565			-11.6945	2.23607
200	-5.9053	0.649583	1.23306	2.23607	-4.67224	2.88565	-5.77829	0.635612	-8.75734	2.23607	-14.5356	2.87168
.	.	.	.	.	.	.	.	.	.	.	.	.
.	.	.	.	.	.	.	.	.	.	.	.	.
.	.	.	.	.	.	.	.	.	.	.	.	.
4350	-7.67271	0.843998	-10.3705	2.23607	-18.0432	3.08007	-5.72392	0.629631	-2.09689	2.23607	-7.82081	2.8657
4400	-5.68499	0.625349	-9.11076	2.23607	-14.7958	2.86142	-5.35896	0.589486	-2.59715	2.23607	-7.95611	2.82555
4450	-7.38481	0.812329	-12.7591	2.23607	-20.1439	3.0484	-5.35896	0.589486	-1.83864	2.23607	-7.1976	2.82555
4500	-7.38481	0.812329	-11.0597	2.23607	-18.4445	3.0484	-5.07902	0.558692	-2.33285	2.23607	-7.41187	2.79476
4550	-7.31178	0.804296	-14.4135	2.23607	-21.7253	3.04036	-5.07902	0.558692	-1.69058	2.23607	-6.7696	2.79476
